# Supplementary material for: Chemical Profile and Bioactivities of Extracts from Edible Plants Readily Available in Portugal
Source: MDPI journal article supplement (doi:10.3390/foods10030673), 2021-03-22
Supplement: s1 [file s1]

**Table S1.** Limit of detection (LOD), limit of quantification (LOQ) and coefficient of linear correlation (R<sup>2</sup>) of the different phenolic compounds tested.

| Phenolic compound                     | LOD (mg/L) | LOQ (mg/L) | R <sup>2</sup> |
|---------------------------------------|------------|------------|----------------|
| Chlorogenic acid                      | 17.71      | 53.67      | 0.9988         |
| Vanillic acid                         | 9.57       | 29.00      | 0.9996         |
| Syringic acid                         | 2.24       | 16.80      | 0.9999         |
| Cinnamic acid                         | 13.99      | 42.40      | 0.9998         |
| <i>p</i> -coumaric acid + epicatechin | 12.78      | 38.71      | 0.9986         |
| <i>o</i> -coumaric acid               | 11.75      | 35.60      | 0.9988         |
| Rosmarinic acid                       | 14.42      | 43.71      | 0.9970         |
| Ellagic acid                          | 30.65      | 92.88      | 0.9912         |
| Naringin                              | 9.89       | 29.96      | 0.9992         |
| Hesperidin                            | 36.87      | 111.7      | 0.9996         |
| Kaempferol                            | 55.48      | 107.5      | 0.9960         |
| Resveratrol                           | 32.95      | 99.85      | 0.9909         |
| Ferulic acid                          | 31.19      | 94.53      | 0.9916         |
| Quercetin                             | 21.34      | 64.67      | 0.9961         |
| 3,4-Dihydroxybenzoic acid             | 9.60       | 29.07      | 0.9993         |

**Table S2.** Extraction yield, chemical profile and antioxidant activity of the extracts produced (mean ± standard deviation).

|              |                  | Yield<br>(%)    | Ch-a<br>(µg/g DP) | Ch-b<br>(µg/g DP) | TProtein<br>(µg BSAE/g DP) | TFC<br>(mg CE/g DP) | TPC<br>(mg GAE/g DP) | Carbohydr.<br>(µg GE/g DP) | DPPH<br>(µmol TE/g DP) | ABTS<br>(µmol TE/g DP) | FRAP<br>(µmol Fe <sup>2+</sup> /g DP) |             |
|--------------|------------------|-----------------|-------------------|-------------------|----------------------------|---------------------|----------------------|----------------------------|------------------------|------------------------|---------------------------------------|-------------|
| Soxhlet      | H <sub>2</sub> O | Tarragon        | 26.8 ± 0.55       | 11.9 ± 0.1        | 40.9 ± 0.33                | 5.54 ± 0.07         | 8.78 ± 0.18          | 24.3 ± 0.41                | 5.94 ± 0.04            | 94.9 ± 1.50            | 130 ± 4.48                            | 232 ± 3.71  |
|              |                  | Spearmint       | 23.6 ± 0.90       | 24.0 ± 0.17       | 72.9 ± 0.24                | 13.1 ± 0.20         | 32.8 ± 1.62          | 44.8 ± 2.29                | 8.91 ± 0.64            | 268 ± 0.50             | 379 ± 6.22                            | 777 ± 8.57  |
|              |                  | Lemon balm      | 25.4 ± 1.40       | 25.3 ± 2.50       | 81.8 ± 7.15                | 11.3 ± 0.76         | 53.5 ± 1.51          | 77.8 ± 9.56                | 29.0 ± 2.79            | 363 ± 19.51            | 533 ± 31.1                            | 1182 ± 126  |
|              |                  | Basil           | 26.1 ± 1.70       | 13.4 ± 4.50       | 44.2 ± 12.7                | 10.7 ± 0.34         | 18.7 ± 1.03          | 33.4 ± 3.38                | 14.8 ± 4.18            | 193 ± 1.20             | 227 ± 3.48                            | 509 ± 19.7  |
|              |                  | French lavender | 25.5 ± 2.10       | 34.0 ± 10.5       | 106 ± 23.8                 | 13.5 ± 0.34         | 34.8 ± 4.44          | 56.5 ± 4.06                | 20.5 ± 2.41            | 293 ± 37.5             | 389 ± 51.9                            | 818 ± 65.5  |
|              |                  | Sage            | 22.5 ± 0.10       | 19.5 ± 0.30       | 62.2 ± 1.10                | 11.7 ± 0.07         | 34.8 ± 0.57          | 50.8 ± 0.83                | 23.0 ± 2.55            | 266 ± 0.50             | 383 ± 4.72                            | 791 ± 35.1  |
|              | EtOH 70%         | Tarragon        | 16.3 ± 0.40       | 194 ± 0.44        | 175 ± 0.12                 | 7.22 ± 0.48         | 12.3 ± 0.74          | 15.9 ± 0.71                | 13.1 ± 0.37            | 62.9 ± 1.08            | 102 ± 19.0                            | 204 ± 19.1  |
|              |                  | Spearmint       | 15.0 ± 0.25       | 177 ± 5.25        | 137 ± 2.32                 | 9.85 ± 0.08         | 26.7 ± 0.62          | 30.7 ± 0.60                | 8.70 ± 0.96            | 232 ± 12.8             | 289 ± 10.1                            | 689 ± 36.3  |
|              |                  | Lemon balm      | 20.6 ± 0.05       | 86.1 ± 5.56       | 99.7 ± 12.7                | 12.5 ± 1.41         | 47.9 ± 1.07          | 54.5 ± 5.56                | 15.6 ± 0.27            | 360 ± 2.36             | 492 ± 8.13                            | 1094 ± 22.9 |
|              |                  | Basil           | 13.4 ± 0.15       | 112 ± 4.58        | 84.9 ± 1.69                | 7.57 ± 0.46         | 10.8 ± 0.02          | 16.6 ± 0.19                | 10.7 ± 0.74            | 85.4 ± 0.97            | 123 ± 0.99                            | 256 ± 1.52  |
|              |                  | French lavender | 21.4 ± 0.40       | 55.0 ± 9.31       | 136 ± 31.8                 | 18.2 ± 1.86         | 30.1 ± 0.43          | 40.4 ± 2.37                | 21.2 ± 1.05            | 213 ± 41.6             | 277 ± 52.9                            | 511 ± 80.6  |
|              |                  | Sage            | 20.6 ± 0.50       | 83.6 ± 10.3       | 83.1 ± 18.6                | 14.2 ± 1.45         | 32.5 ± 1.71          | 43.3 ± 2.50                | 21.2 ± 1.03            | 281 ± 23.8             | 357 ± 27.6                            | 857 ± 66.7  |
| Solid-liquid | H <sub>2</sub> O | Tarragon        | 26.2 ± 1.87       | 11.0 ± 0.99       | 34.7 ± 3.20                | 0.63 ± 0.15         | 6.59 ± 0.62          | 19.3 ± 0.85                | 24.4 ± 3.27            | 57.8 ± 1.54            | 87.0 ± 2.24                           | 143 ± 2.72  |
|              |                  | Spearmint       | 25.4 ± 2.12       | 20.1 ± 5.84       | 55.2 ± 13.4                | 7.84 ± 0.44         | 28.5 ± 3.81          | 40.4 ± 2.47                | 17.4 ± 0.37            | 220 ± 28.0             | 324 ± 30.9                            | 621 ± 65.6  |
|              |                  | Lemon balm      | 31.0 ± 0.22       | 95.4 ± 11.2       | 271 ± 26.3                 | 11.5 ± 1.56         | 25.5 ± 7.15          | 81.9 ± 2.90                | 24.8 ± 2.29            | 303 ± 29.0             | 410 ± 75.3                            | 693 ± 97.7  |
|              |                  | Basil           | 27.9 ± 0.32       | 22.6 ± 0.99       | 67.5 ± 2.26                | 4.97 ± 0.18         | 18.9 ± 0.56          | 30.9 ± 1.48                | 12.1 ± 2.76            | 157 ± 10.6             | 197 ± 129                             | 400 ± 9.76  |
|              |                  | French lavender | 25.9 ± 0.35       | 20.5 ± 0.29       | 87.7 ± 1.89                | 8.32 ± 0.21         | 31.7 ± 0.65          | 40.9 ± 1.30                | 21.4 ± 3.68            | 183 ± 54.8             | 262 ± 63.3                            | 478 ± 112   |
|              |                  | Sage            | 22.1 ± 0.22       | 26.6 ± 1.33       | 77.6 ± 3.13                | 7.15 ± 0.51         | 21.6 ± 0.88          | 37.6 ± 4.54                | 13.3 ± 2.07            | 210 ± 9.79             | 265 ± 3.16                            | 562 ± 14.7  |
|              | EtOH 70%         | Tarragon        | 22.2 ± 0.42       | 175 ± 9.58        | 260 ± 1.21                 | 4.82 ± 0.21         | 6.22 ± 0.26          | 20.6 ± 1.28                | 21.4 ± 1.26            | 43.0 ± 14.1            | 114 ± 3.71                            | 203 ± 6.45  |
|              |                  | Spearmint       | 20.6 ± 0.90       | 155 ± 0.06        | 303 ± 10.6                 | 6.55 ± 0.55         | 33.4 ± 1.95          | 56.1 ± 3.52                | 16.7 ± 1.61            | 312 ± 21.3             | 434 ± 31.0                            | 808 ± 57.2  |
|              |                  | Lemon balm      | 25.8 ± 0.52       | 151 ± 0.31        | 306 ± 2.84                 | 7.40 ± 0.38         | 59.1 ± 4.62          | 77.7 ± 5.38                | 18.9 ± 2.35            | 365 ± 0.98             | 596 ± 15.4                            | 1166 ± 34.3 |
|              |                  | Basil           | 19.6 ± 0.91       | 124 ± 0.58        | 207 ± 4.68                 | 2.95 ± 0.16         | 15.3 ± 1.26          | 25.6 ± 1.29                | 10.3 ± 3.95            | 153 ± 10.0             | 217 ± 6.84                            | 342 ± 11.7  |
|              |                  | French lavender | 27.3 ± 0.71       | 65.4 ± 4.28       | 133 ± 8.87                 | 6.16 ± 0.16         | 32.2 ± 2.28          | 38.1 ± 2.93                | 22.7 ± 2.66            | 283 ± 11.0             | 381 ± 15.4                            | 682 ± 39.8  |
|              |                  | Sage            | 23.9 ± 0.40       | 104 ± 3.17        | 158 ± 8.87                 | 5.49 ± 0.17         | 36.7 ± 2.89          | 64.7 ± 4.91                | 12.3 ± 0.82            | 310 ± 7.84             | 437 ± 11.4                            | 846 ± 44.7  |
